# Supplementary material for: A Review of the Respiratory Health Burden Attributable to Short-Term Exposure to Pollen
Source: MDPI journal article supplement (doi:10.3390/ijerph19127541), 2022-06-20
Supplement: s1 [file s1]

## Supplementary Material

Table S1. Search strategy to identify relevant papers on PubMed database.

| Type of articles                    | Outcomes                                    | Search terms                                                                                                     |
|-------------------------------------|---------------------------------------------|------------------------------------------------------------------------------------------------------------------|
| Systematic reviews (inception-2022) | Any of the respiratory outcomes of interest | (pollen) AND ("systematic review")                                                                               |
| Original articles (2020-2022)       | Airway inflammation                         | ((pollen) AND ("airway inflammation")) AND<br>(("2020/01/01"[Date - Publication] : "3000"[Date - Publication]))  |
| Original articles (2020-2022)       | Thunderstorm asthma                         | ((pollen) AND ("thunderstorm asthma")) AND<br>(("2020/01/01"[Date - Publication] : "3000"[Date - Publication]))  |
| Original articles (2020-2022)       | Asthma in children                          | ((pollen) AND (asthma)) AND (child*) AND (("2020/01/01"[Date - Publication] : "3000"[Date - Publication]))       |
|                                     |                                             | ((pollen) AND (asthma)) AND (paed*) AND (("2020/01/01"[Date - Publication] : "3000"[Date - Publication]))        |
| Original articles (inception -2022) | Asthma in adults                            | ((pollen) AND (asthma)) AND (adult) AND (English[Language])                                                      |
| Original articles (inception -2022) | COPD                                        | (pollen) AND (COPD)                                                                                              |
| Original articles (inception -2022) | General Practice                            | (pollen) AND ("general practice")                                                                                |
| Original articles (2020-2022)       | Upper and lower respiratory symptoms        | ((pollen) AND ("respiratory symptoms")) AND<br>(("2020/01/01"[Date - Publication] : "3000"[Date - Publication])) |
| Original articles (2020-2022)       | Lung function                               | ((pollen) AND ("lung function")) AND (("2020/01/01"[Date - Publication] : "3000"[Date - Publication]))           |

|                   |              |                                                                                                              |
|-------------------|--------------|--------------------------------------------------------------------------------------------------------------|
| Original articles | Interactions | No search terms were used. Effect modifiers were determined from relevant papers identified from the search. |
|-------------------|--------------|--------------------------------------------------------------------------------------------------------------|
